# Supplementary material for: The origin and maintenance of supergenes contributing to ecological adaptation in Atlantic herring
Source: PubMed Central journal article supplement (PMC11499932; doi:10.1038/s41467-024-53079-7), 2024-10-23
Supplement: 41467_2024_53079_MOESM1_ESM.pdf [file 41467_2024_53079_MOESM1_ESM.pdf]

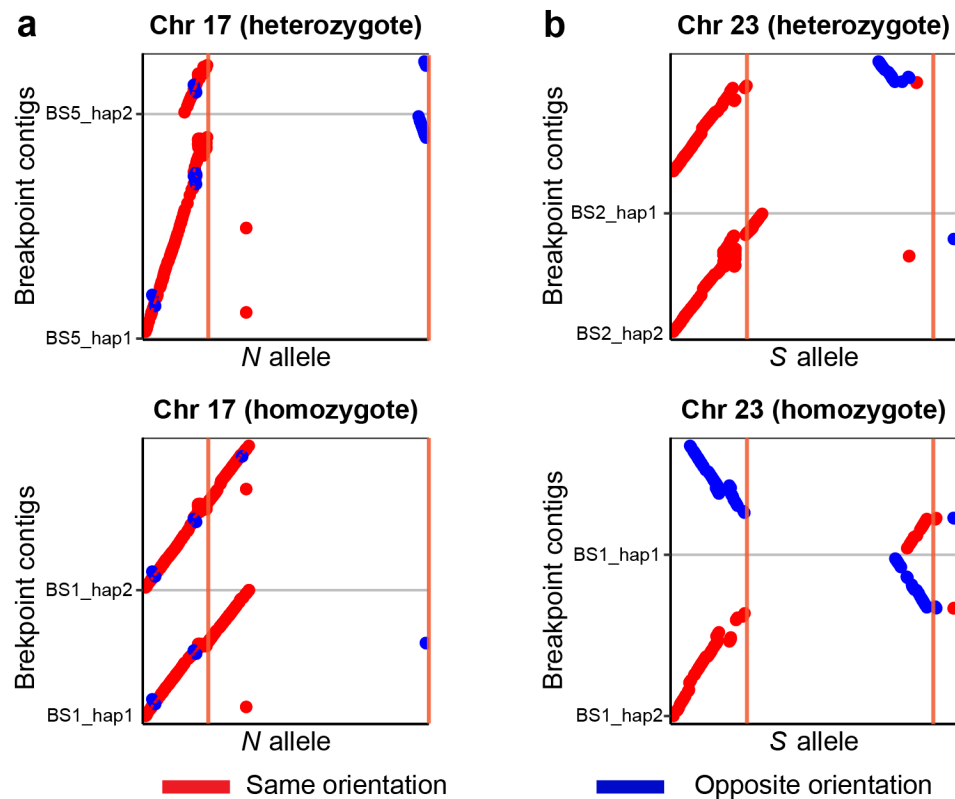

**Supplementary Fig. 1. Dot plot of the PacBio proximal breakpoint contigs from hap1 and hap2 assemblies (Y-axis) for two heterozygotes and two homozygotes compared with the inversion alleles in the reference assembly (X-axis).** Vertical pink lines are the inversion breakpoints and the horizontal line divides the data from the two haplotypes. **a** Chr17. BS5 is heterozygous for Chr17 inversion, where BS5\_hap1 assembly has *S* haplotype and BS5\_hap2 assembly has *N* haplotype. The homozygote (*NN*) sample (BS1) is used as a control. **b** Chr23. BS2 is heterozygous for Chr23 inversion, where BS2\_hap1 assembly has *N* haplotype and BS2\_hap2 assembly has *S* haplotype. The homozygote sample (BS1) is used as a control with *NN* arrangement. The sequence lengths for Chr17 *N* allele and Chr23 *S* allele are 2.8 Mb and 3.0 Mb, respectively. This analysis was performed for all individuals subjected to PacBio sequencing.

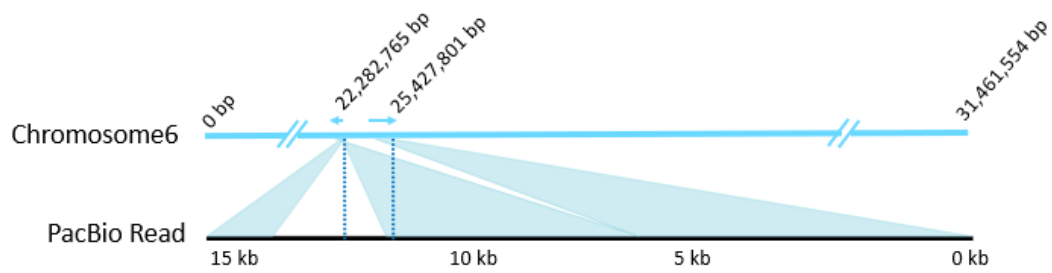

**Supplementary Fig. 2. Single PacBio read spanning proximal and distal breakpoint of Chr6 inversion from the CS2 sample on the reference sequence. The inversion breakpoints are shown in dotted lines.**

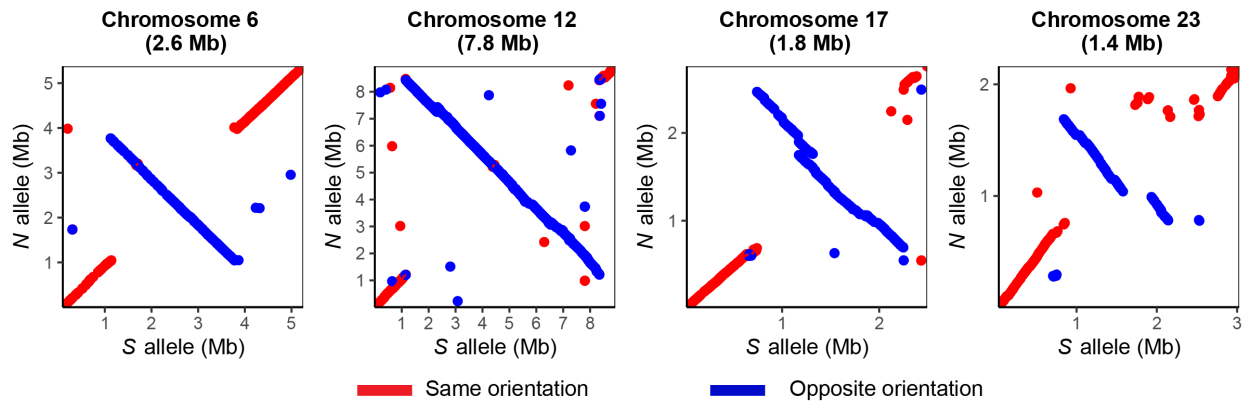

**Supplementary Fig. 3. Sequence alignment of *N* and *S* alleles for all four inversions.** *N* and *S* alleles are represented by the CS10\_hap1 and BS3\_hap2 inversion scaffolds, respectively.

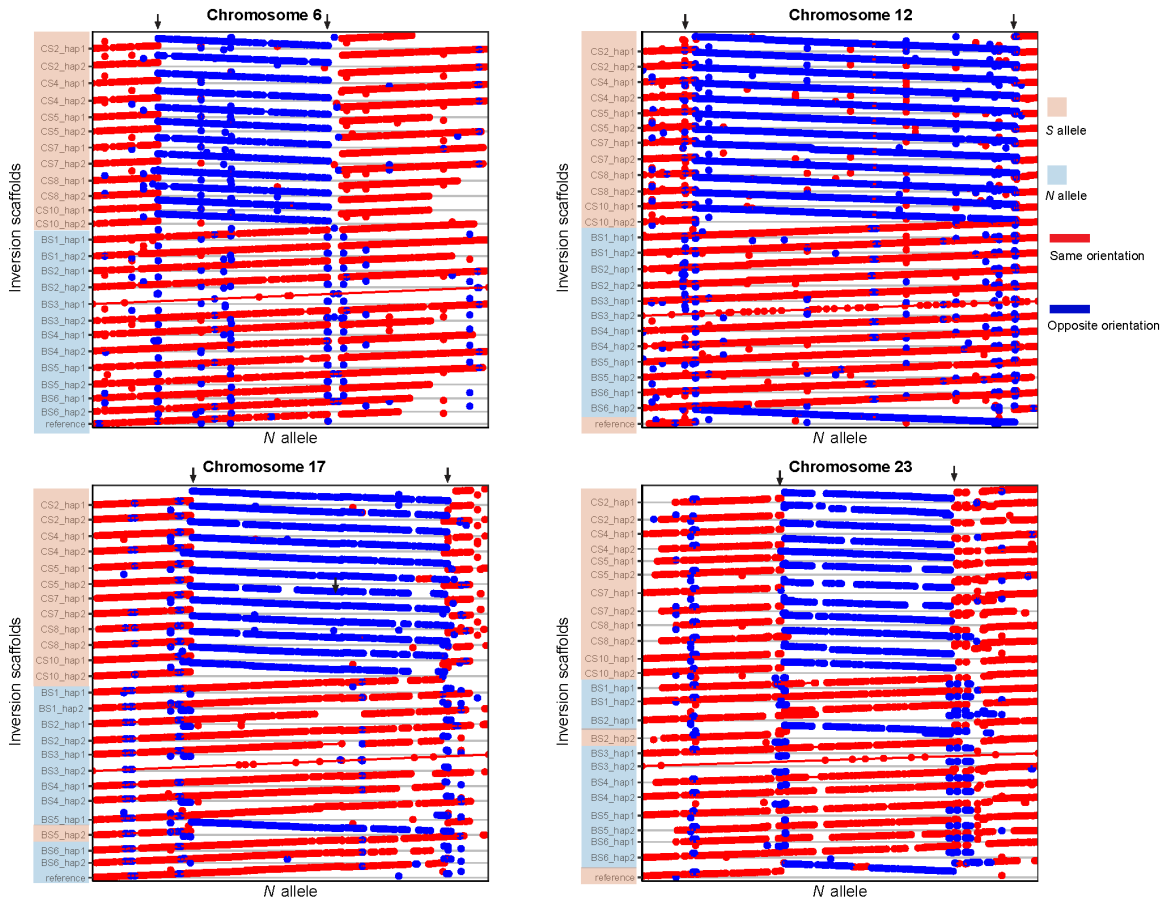

**Supplementary Fig. 4. Dot plots of inversion alleles.** Y-axis has all inversion alleles assembled in this study from PacBio assemblies and the reference assembly. X-axis has a reference inversion *N* allele constructed using CS10\_hap1 assembly. Inverted duplications at the breakpoint of chromosome 6, 12, and 17 inversions are indicated in the figure by black arrows above the dot plots. Red color indicates alignment in the same orientation and blue color indicates alignment in the opposite orientation. The sequence lengths for chromosome 6, 12, 17, and 23 inversion scaffolds are nearly 5.0 Mb, 9.0 Mb, 2.8 Mb, and 3.0 Mb, respectively.

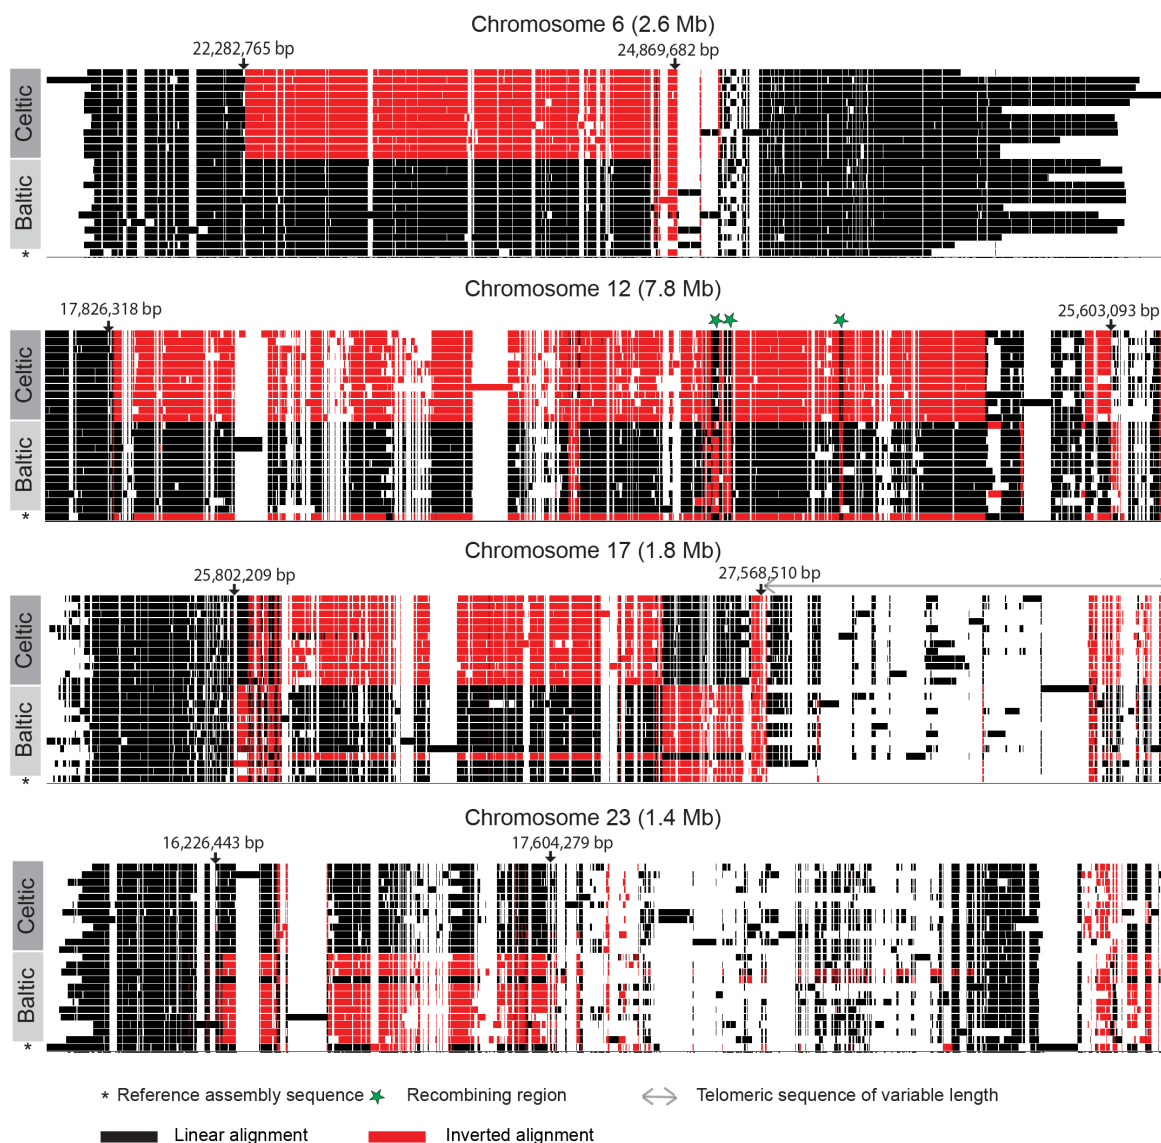

**Supplementary Fig. 5. Pangenome graphs using 25 sequences (24 inversion scaffolds and one reference assembly) for inversions on chromosomes 6, 12, 17, and 23.** Top 12 sequences are from Celtic Sea samples and the next 12 sequences are from Baltic Sea samples. The last sequence indicated with an asterisk is from the reference assembly. Black and red colors represent opposite orientations of the sequence hence, the vertical boundary of black and red are the inversion breakpoints, also indicated in bp at the top. Possible recombining regions on Chr12 inversions are indicated by green stars at the top of its genome graph. Variable telomeric sequence (0-300 kb in range) outside the breakpoint on Chr17 is indicated by grey line. The sequence lengths for chromosome 6, 12, 17, and 23 pangenome graphs are nearly 5.0 Mb, 9.0 Mb, 2.5 Mb, and 3.0 Mb, respectively.

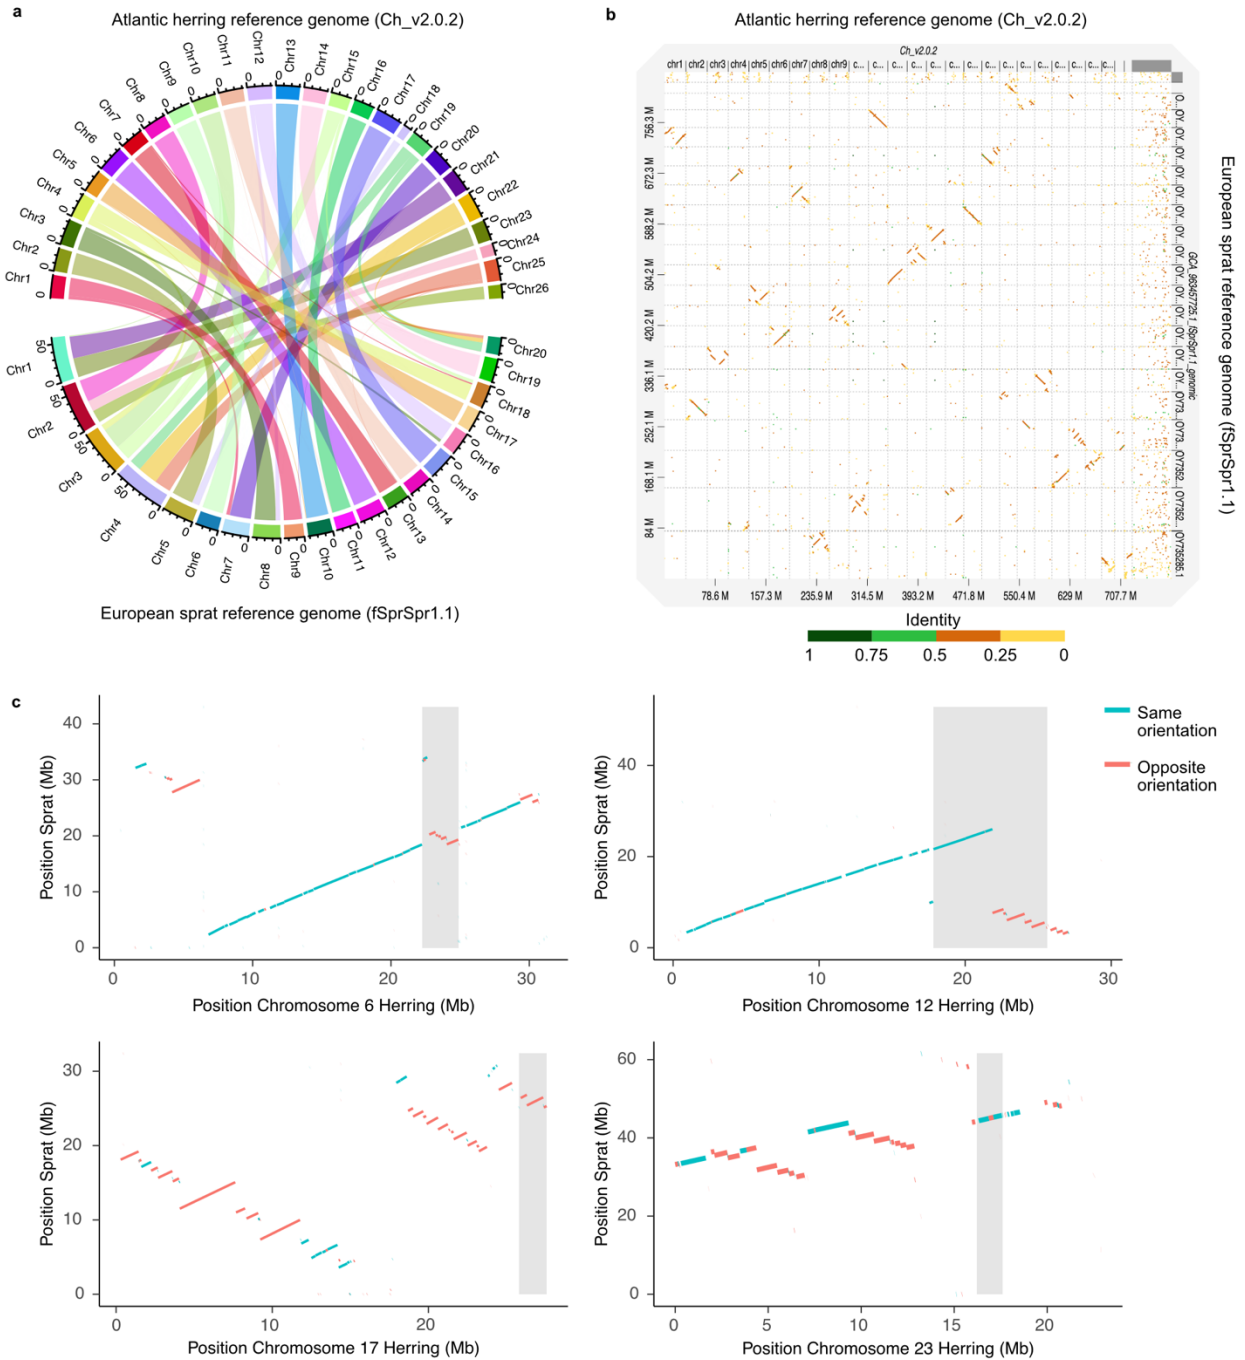

**Supplementary Fig. 6. Sequence comparison of Atlantic herring and European sprat genome assemblies and herring inversions.** **a** Synteny between the Atlantic herring and the European sprat reference genomes as proportion of aligned regions. **b** D-GENIES dot plot of Atlantic herring and European sprat reference genomes showing alignment blocks longer than 10 kb and with identity higher than 0.25. **c** Dot plots for the four Atlantic herring chromosomes containing inversions (chromosomes 6, 12, 17, and 23).

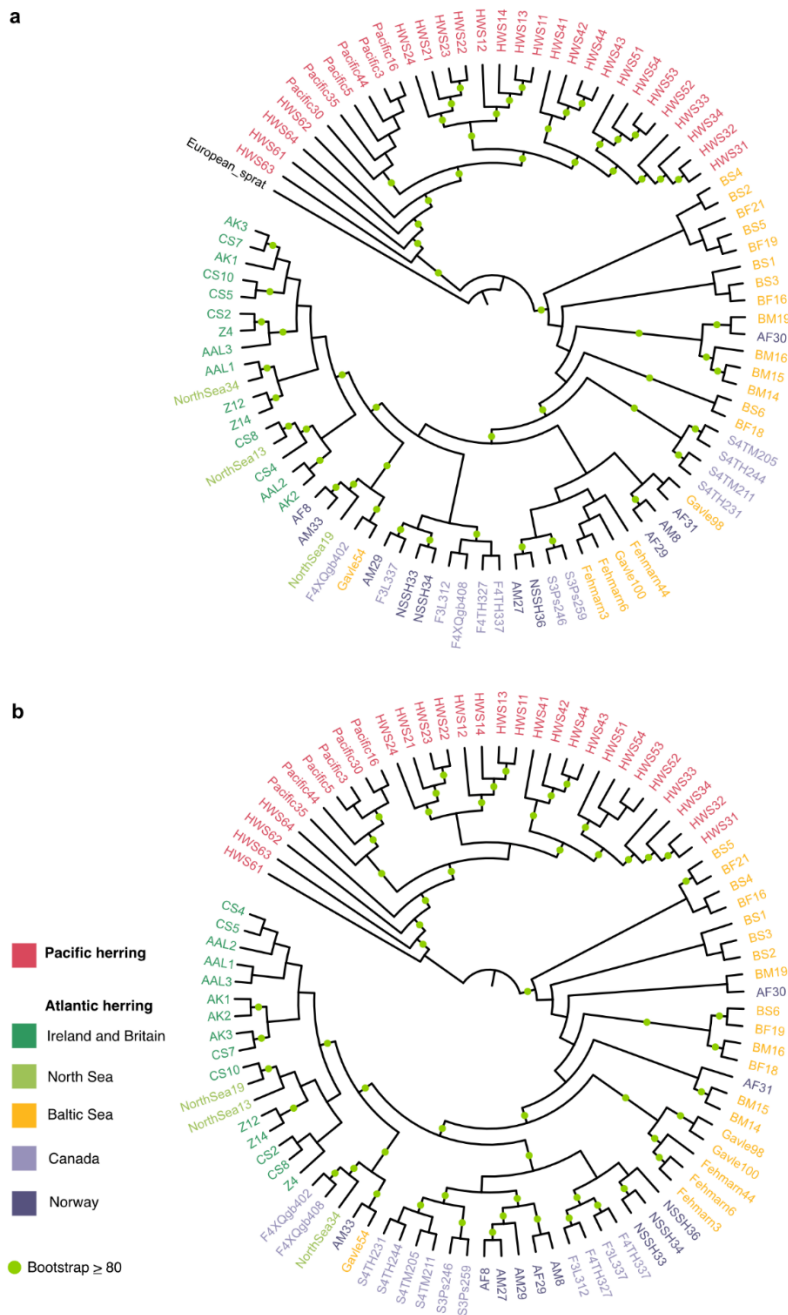

**Supplementary Fig. 7. The evolutionary history of Atlantic and Pacific herring.** Maximum likelihood trees (branch lengths were ignored to facilitate visualization of relationships among individuals) that are rooted with **a** European sprat or **b** at the branch that connects Pacific and Atlantic herring, following the topology of the tree in **a**. A concatenated alignment of 15,471 genes (~114 Mb) was used to produce tree in panel **a**, and a genome-wide alignment of 345,966,161 positions with no missing data was used to produce the tree in panel **b**.

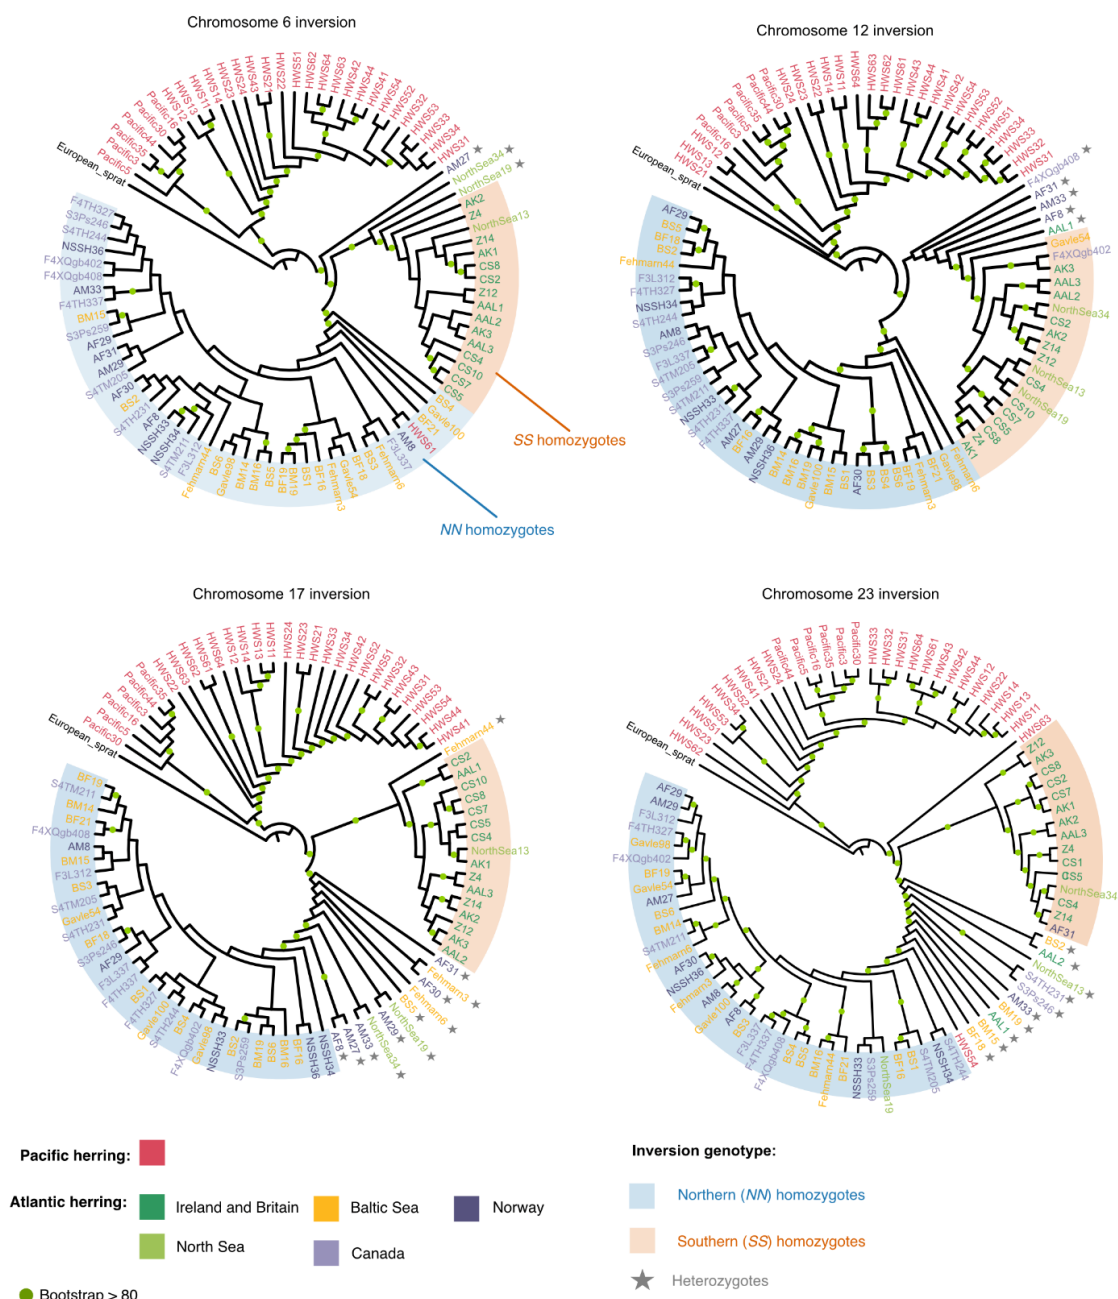

**Supplementary Fig. 8. The evolutionary history of Atlantic herring chromosomal inversions.** Maximum likelihood cladograms (branch lengths of maximum likelihood trees were ignored to facilitate visualization of relationships among individuals) of concatenated alignments of chromosome 6, 12, 17 and 23 inversion regions, including the European sprat as an outgroup. Individuals are color coded by species or Atlantic herring population. Shades behind individuals indicate their inversion genotype according to Supplementary Fig. 2, and heterozygotes are indicated with a star.



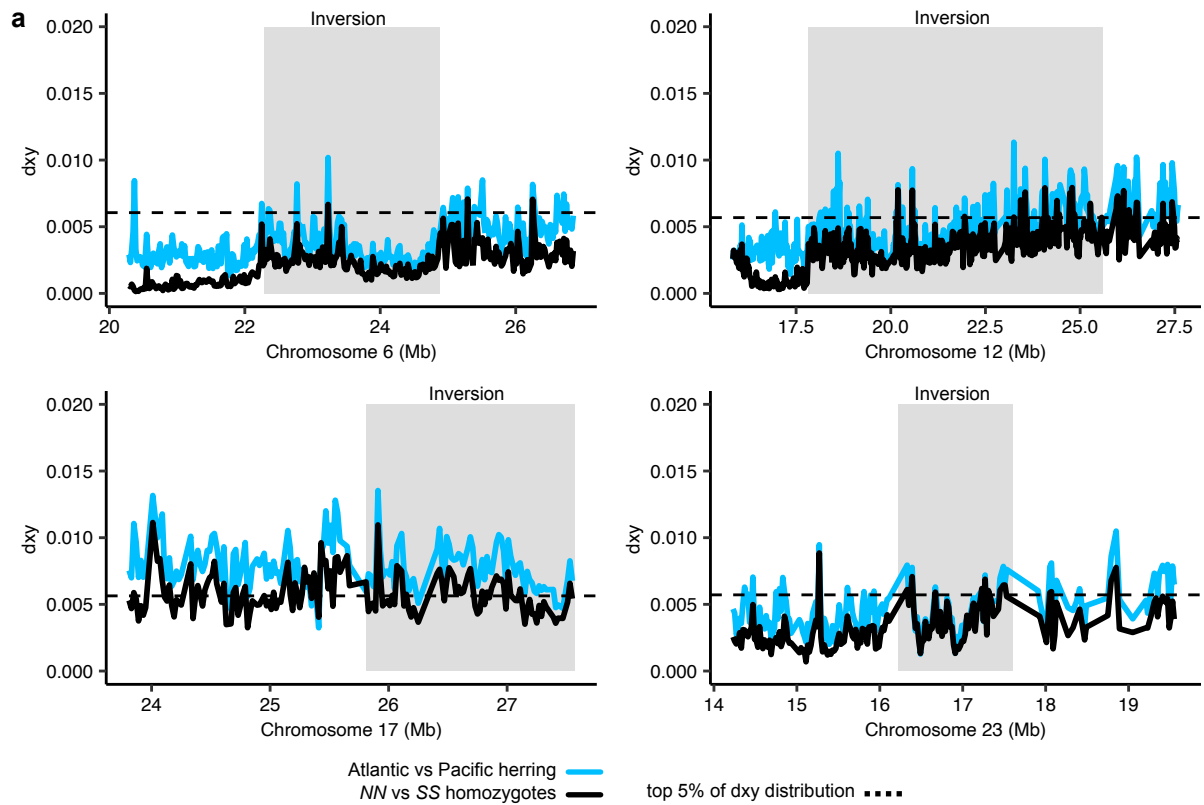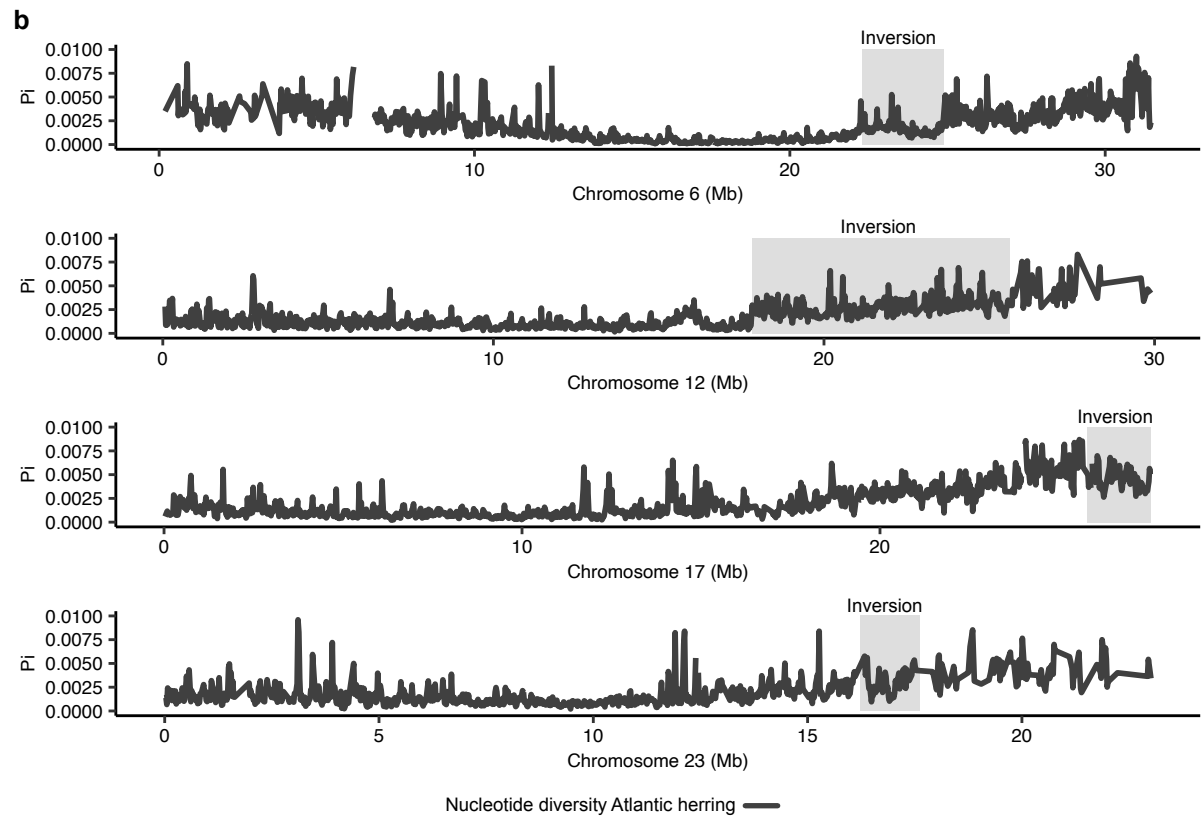

**Supplementary Fig. 9. Divergence and diversity in and around inversion regions in Atlantic herring.** **a** Divergence ( $d_{xy}$ ) between North and South homozygotes for inversion alleles (black line) compared to divergence between Atlantic ( $n = 61$ ) and Pacific ( $n = 30$ ) herring (blue line). Number of North homozygous for  $N$  alleles is  $n_{chr6} = 20$ ,  $n_{chr12} = 19$ ,  $n_{chr17} = 16$  and  $n_{chr23} = 16$ , and number of South homozygous for  $S$  alleles is  $n_{chr6} = 15$ ,  $n_{chr12} = 15$ ,  $n_{chr17} = 15$  and  $n_{chr23} = 13$ . The dashed line represents the top 5% of the  $d_{xy}$  distribution between North and South homozygotes. **b** Distribution of nucleotide diversity (dark gray line) of 61 Atlantic herring individuals across chromosomes 6, 12, 17 and 23 containing inversions, showing that certain inversions (e.g., chromosome 17) occur in genomic regions of elevated high nucleotide diversity.

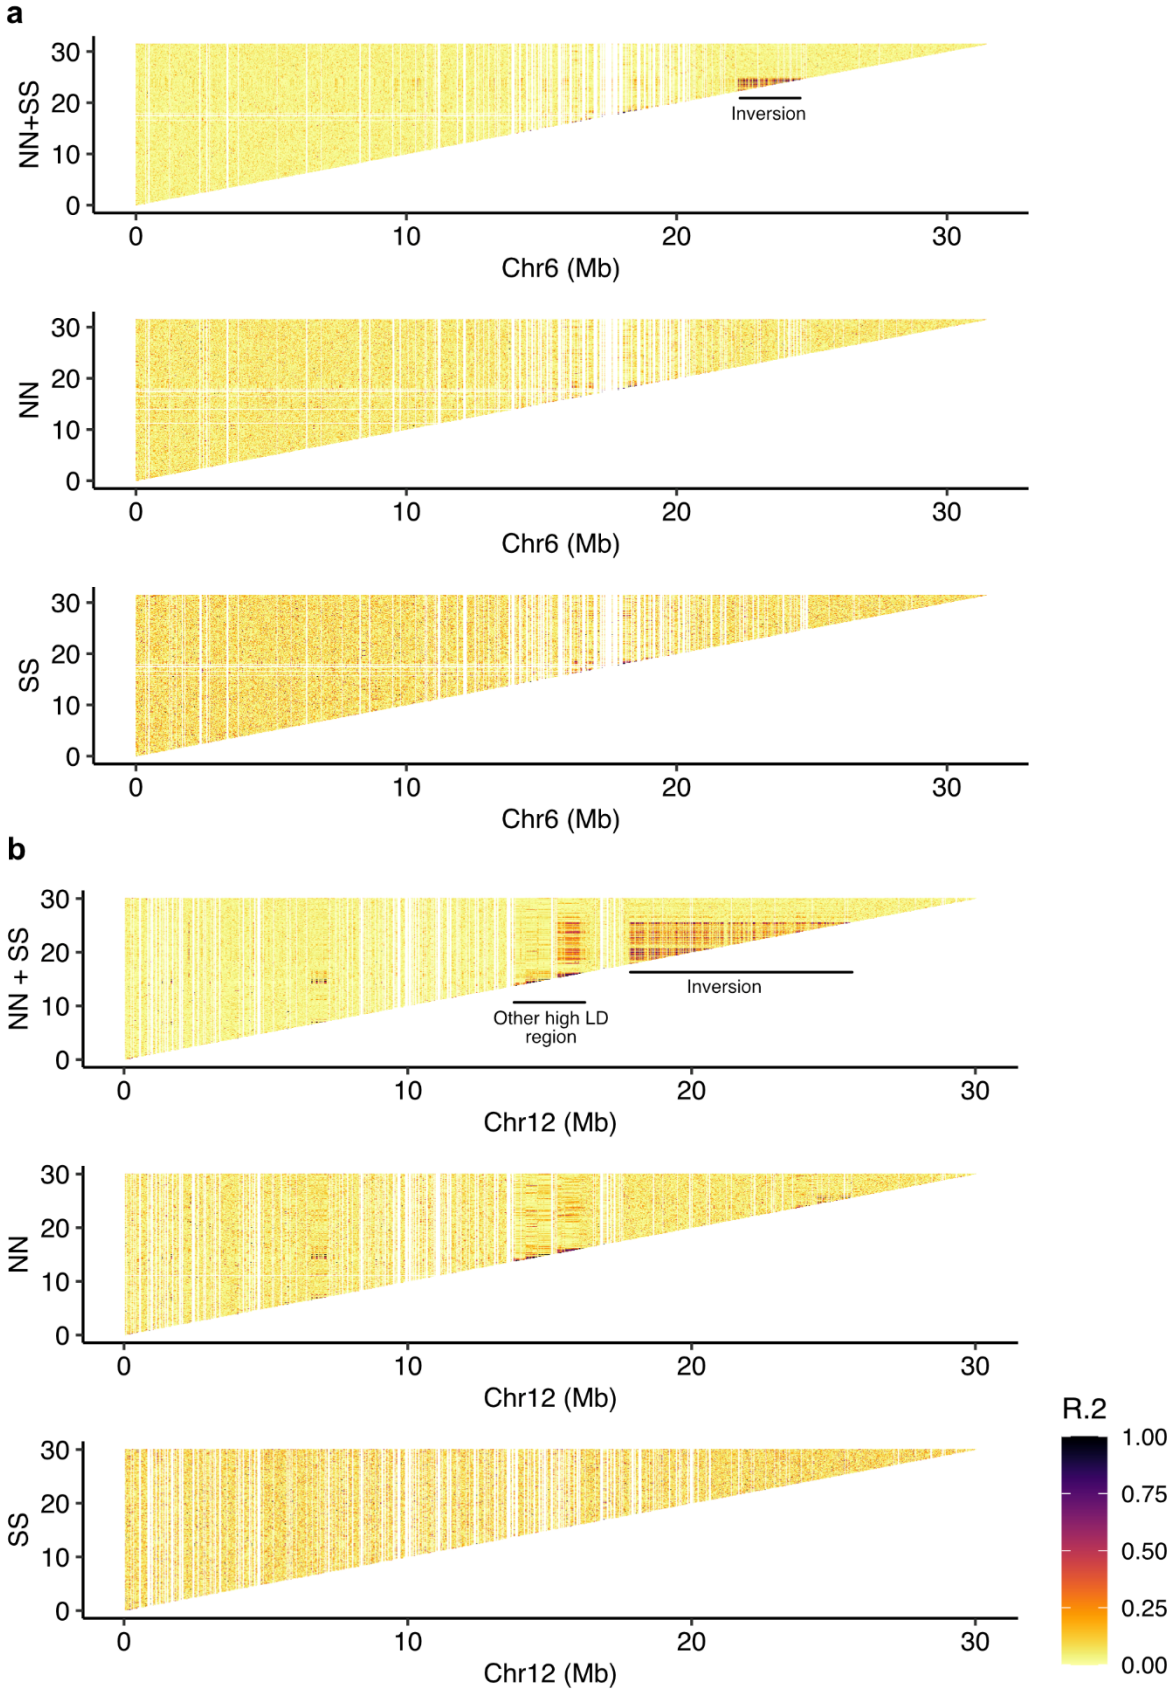

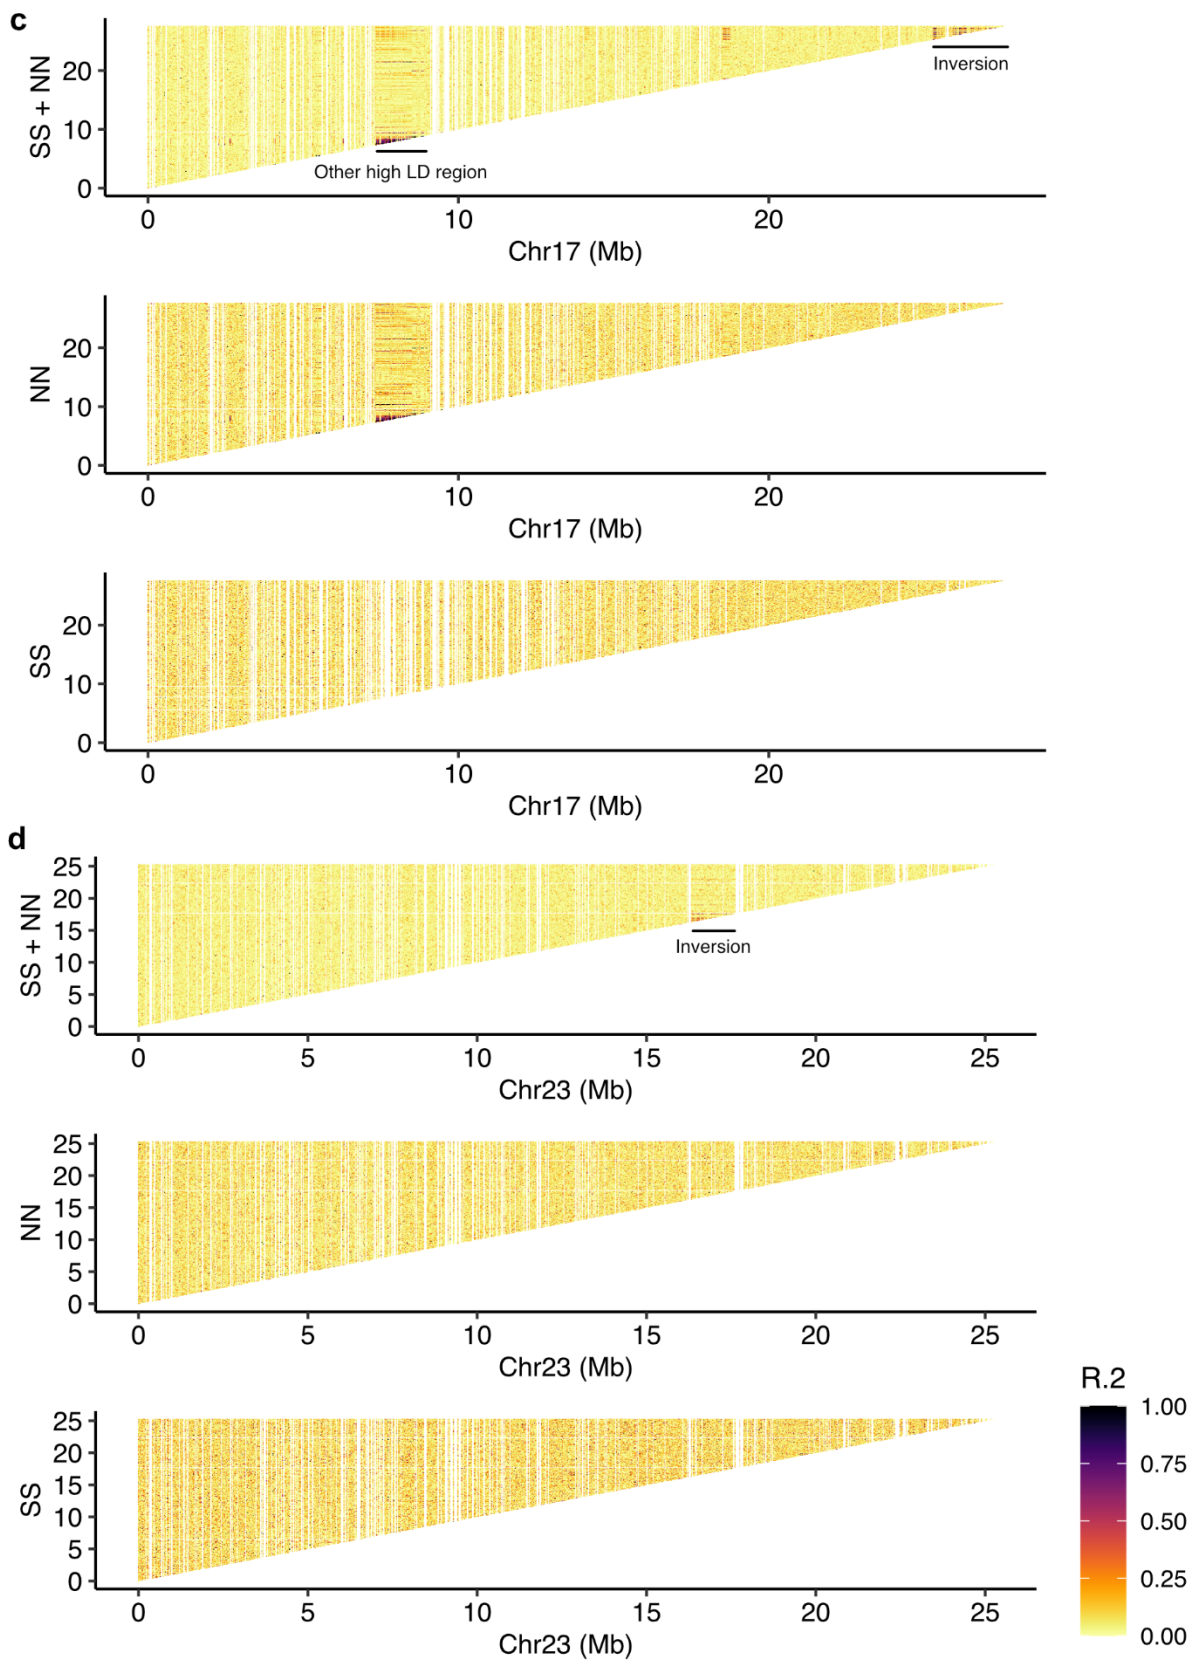

**Supplementary Fig. 10. Linkage disequilibrium (LD) in herring a Chr6, b Chr12, c Chr17 and d Chr23, containing inversions.** For each chromosome, LD is plotted as  $R^2$ . Top plots combine Southern and Northern homozygotes ( $NN+SS$ ), evidencing the high LD within the inversion regions in the context of the entire chromosome which should be recombining freely, with the exception of a few other regions of high LD. The two bottom plots only include Northern ( $NN$ ) or Southern ( $SS$ ) homozygotes demonstrating the lack of LD, suggesting normal recombination rate within the inversion regions. Number of North homozygotes for  $N$  alleles is  $n_{chr6} = 20$ ,  $n_{chr12} = 19$ ,  $n_{chr17} = 16$  and  $n_{chr23} = 16$ , and number of South homozygotes for  $S$  alleles is  $n_{chr6} = 15$ ,  $n_{chr12} = 15$ ,  $n_{chr17} = 15$  and  $n_{chr23} = 13$ .

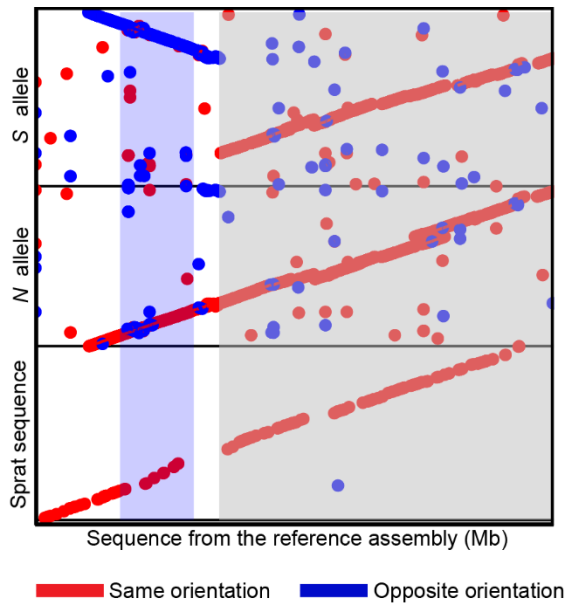

**Supplementary Fig. 11. Dot plot comparing high- $F_{ST}$  and inversion sequence on chromosome 17 from the Atlantic herring reference assembly with sequences from sprat assembly,  $S$  allele from PacBio assembly, and  $N$  allele from PacBio assembly.** Red and blue colors represent forward and reverse orientations of the alignments, respectively. Blue shaded region corresponds to high- $F_{ST}$  sequence, while grey shaded region corresponds to the inversion sequence. The sequence lengths for sprat sequence,  $S$  allele, and  $N$  allele are 2.8 Mb, 2.6 Mb, and 2.8 Mb, respectively.

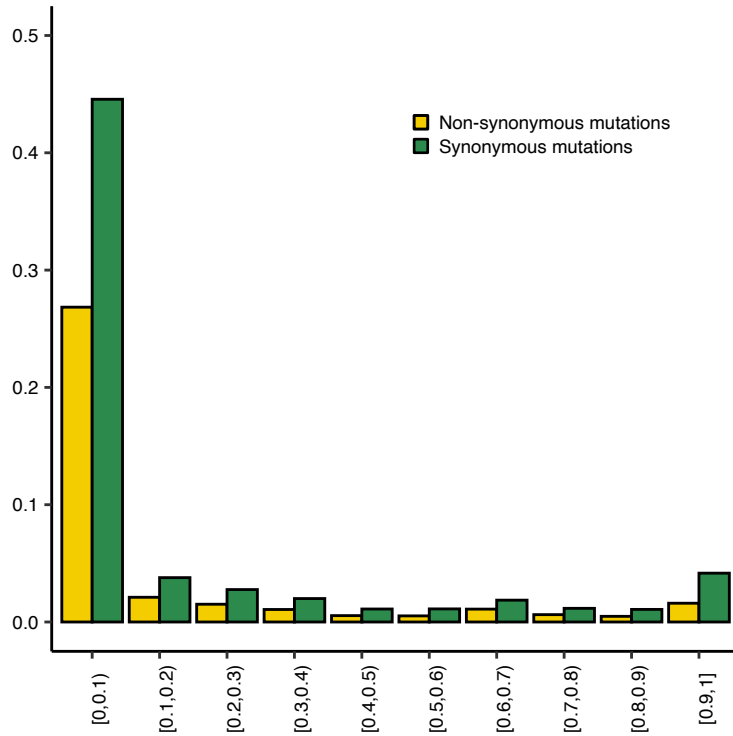

**Supplementary Fig. 12. Site frequency spectra of derived non-synonymous (yellow bars) and synonymous (green bars) mutations for the whole genome.** Allele frequencies were derived from 61 Atlantic herring individuals.

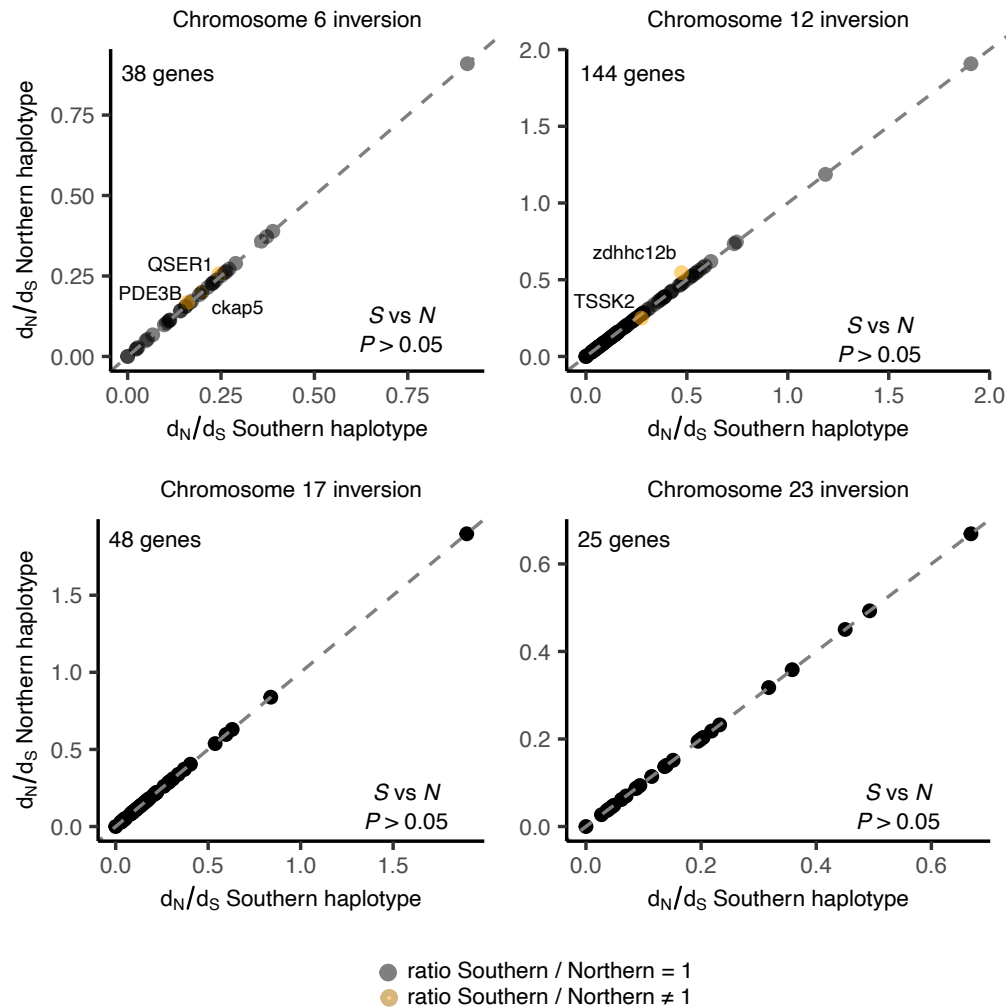

**Supplementary Fig. 13. Comparison of  $d_N/d_S$  ratios for genes within the Northern ( $N$ ) and Southern ( $S$ ) inversion haplotypes.**  $d_N/d_S$  values were calculated considering a consensus sequence for  $N$  and  $S$  haplotypes obtained from homozygotes. Genes where the ratio of  $d_N/d_S$  between  $N$  and  $S$  haplotypes deviates from one are highlighted in orange. A two-sided  $t$ -test reveals no significant differences in the distribution of  $d_N/d_S$  values between  $N$  and  $S$  haplotypes.



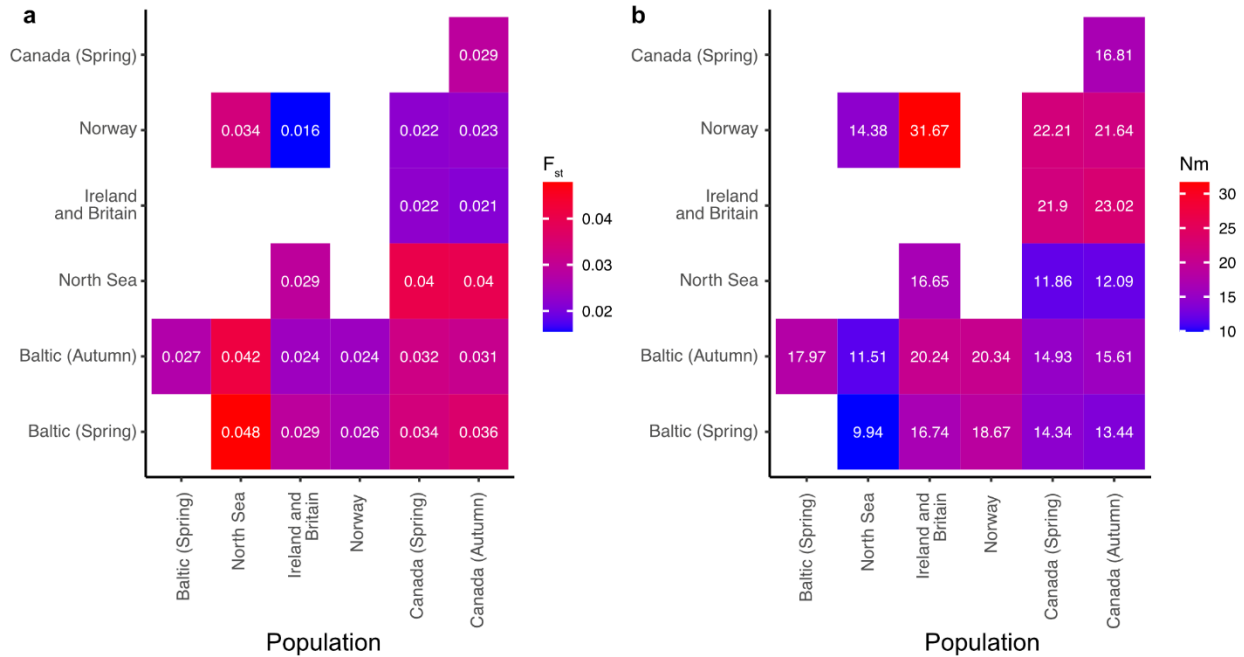

**Supplementary Fig. 14. a Differentiation as  $F_{st}$  and b population migration rate ( $Nm$ ) between Atlantic herring populations.** Sample sizes are as follows: Canada Spring  $n = 6$ , Canada Autumn  $n = 6$ , Norway  $n = 11$ , Ireland and Britain  $n = 15$ , Baltic Spring  $n = 14$ , Baltic Autumn  $n = 6$ .

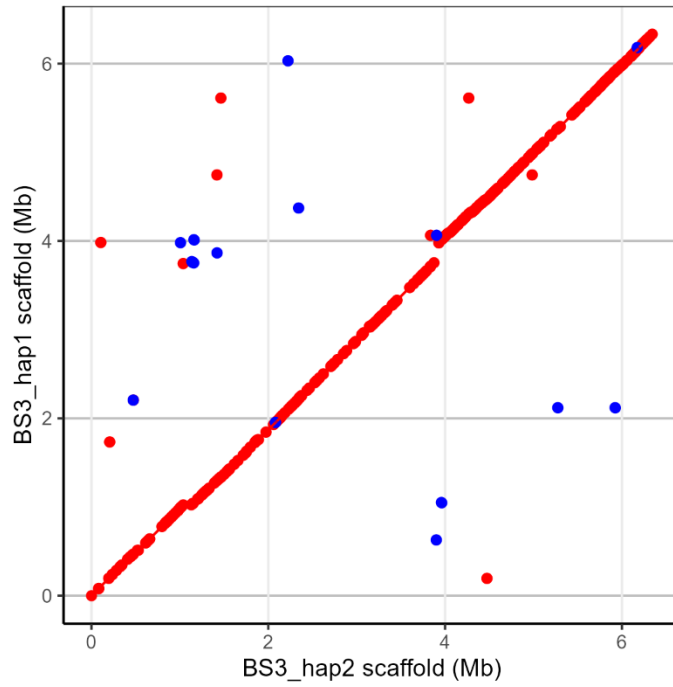

**Supplementary Fig. 15. Dot plot showing alignment of Chr6 inversion-scaffold from BS3\_hap1 (Y-axis) and BS3\_hap2 (X-axis).**

**Supplementary Table 1. Genome statistics for Celtic Sea (CS) and Baltic Sea (BS) PacBio genome assemblies using hifiasm assembler.** Hap1 and hap2 are the two haplotype genomes and their statistics are shown on the top and bottom row for each sample, respectively.

| Samples        | Genome size (Mb) | Genome completeness (%) | No. contigs | N50 (Kb) |
|----------------|------------------|-------------------------|-------------|----------|
| CS2            | 769.1            | 91.5                    | 4364        | 524.8    |
|                | 744.6            | 91.6                    | 3314        | 547.9    |
| CS4            | 776.3            | 92.8                    | 3253        | 693.1    |
|                | 751.3            | 92.8                    | 2539        | 731.1    |
| CS5            | 768.1            | 91.6                    | 3817        | 545.0    |
|                | 745.9            | 91.6                    | 3037        | 569.8    |
| CS7            | 783.6            | 92.0                    | 3929        | 469.5    |
|                | 751.1            | 90.6                    | 3117        | 512.3    |
| CS8            | 781.7            | 91.9                    | 4100        | 526.5    |
|                | 743.2            | 91.5                    | 3280        | 504.5    |
| CS10           | 773.1            | 90.7                    | 3997        | 452.8    |
|                | 756.6            | 90.3                    | 3228        | 472.4    |
| BS1            | 776.2            | 91.6                    | 3756        | 576.2    |
|                | 751.8            | 91.4                    | 3028        | 606.5    |
| BS2            | 788.3            | 91.8                    | 3769        | 540.9    |
|                | 759.7            | 90.7                    | 2952        | 539.8    |
| BS3            | 779.2            | 92.4                    | 3331        | 680.2    |
|                | 758.5            | 92.1                    | 2725        | 661.8    |
| BS4            | 792.2            | 92.8                    | 3309        | 737.1    |
|                | 760.1            | 92.0                    | 2570        | 735.4    |
| BS5            | 780.3            | 90.6                    | 4045        | 494.0    |
|                | 751.8            | 91.1                    | 3259        | 480.0    |
| BS6            | 787.8            | 92.2                    | 3771        | 572.2    |
|                | 764.3            | 92.3                    | 3083        | 557.1    |
| European sprat | 850.3            | 91.8                    | 4748        | 544.6    |
|                | 802.4            | 91.7                    | 3611        | 590.2    |

**Supplementary Table 2. Genome statistics for Celtic Sea (CS) and Baltic Sea (BS) PacBio genome assemblies using HiCanu assembler.** Hap1 and hap2 are the two haplotype genomes and their statistics are shown on the top and bottom row for each sample, respectively.

| Samples | Genome size (Mb) | No. contigs | N50 (Kb) |
|---------|------------------|-------------|----------|
| CS2     | 747.7            | 3497        | 554.3    |
|         | 774.7            | 9155        | 234.1    |
| CS4     | 797.7            | 3029        | 744.8    |
|         | 721.9            | 5289        | 306.9    |
| CS5     | 760.0            | 3202        | 564.2    |
|         | 728.4            | 6000        | 267.7    |
| CS7     | 759.4            | 3468        | 489.6    |
|         | 710.3            | 5736        | 244.7    |
| CS8     | 760.6            | 3347        | 553.2    |
|         | 738.0            | 6330        | 243.4    |
| CS10    | 763.6            | 3447        | 507.1    |
|         | 710.8            | 5969        | 231.9    |
| BS1     | 626.3            | 3064        | 626.3    |
|         | 281.3            | 5584        | 281.3    |
| BS2     | 586.6            | 3000        | 586.6    |
|         | 265.6            | 5802        | 265.6    |
| BS3     | 724.0            | 2682        | 724.0    |
|         | 321.1            | 5559        | 321.1    |
| BS4     | 805.2            | 2615        | 805.2    |
|         | 342.4            | 5750        | 342.4    |
| BS5     | 531.4            | 3357        | 531.4    |
|         | 241.5            | 5983        | 241.5    |
| BS6     | 606.3            | 3083        | 606.3    |
|         | 270.9            | 5797        | 270.9    |

**Supplementary Table 3. Inversion breakpoints for *S* (Celtic Sea) and *N* (Baltic Sea) haplotypes on four chromosomes based on the inversion scaffolds from the PacBio assemblies (CS10\_hap1 and BS3\_hap1 assemblies for chromosome 6 inversion; and CS10\_hap1 and BS3\_hap2 assemblies for inversions on chromosomes 12, 17, and 23).**

| Chromosome | Sample | Proximal breakpoint | Distal breakpoint |
|------------|--------|---------------------|-------------------|
| 6          | Celtic | 1,144,464           | 3,774,578         |
|            | Baltic | 1,051,601           | 3,747,148         |
| 12         | Celtic | 1,156,916           | 8,338,930         |
|            | Baltic | 1,215,813           | 8,428,837         |
| 17         | Celtic | 741,635             | 2,249,708         |
|            | Baltic | 687,774             | 2,468,994         |
| 23         | Celtic | 854,555             | 2,134,906         |
|            | Baltic | 788,123             | 1,676,584         |

**Supplementary Table 4. Sequence analysis of inverted duplications flanking the inversion alleles**

|                | <i>S_allele</i> :<br>proximal vs.<br>distal | <i>N_allele</i> :<br>proximal vs. distal | proximal:<br><i>N_allele</i> vs. <i>S_allele</i> | distal:<br><i>N_allele</i> vs. <i>S_allele</i> |
|----------------|---------------------------------------------|------------------------------------------|--------------------------------------------------|------------------------------------------------|
| chromosome 6   |                                             |                                          |                                                  |                                                |
| length (bp)    | 8346 vs. 7651                               | 21931 vs. 21641                          | 21931 vs. 8346                                   | 21641 vs. 7651                                 |
| % identity     | 94.48                                       | 99.00                                    | 96.97                                            | 94.21                                          |
| query coverage | 91                                          | 99                                       | 90                                               | 99                                             |
| chromosome 12  |                                             |                                          |                                                  |                                                |
| length (bp)    | 6858 vs. 6874                               | 7811 vs. 7834                            | 7811 vs. 6858                                    | 7834 vs. 6874                                  |
| % identity     | 98.62                                       | 98.61                                    | 99.39                                            | 99.07                                          |
| query coverage | 99                                          | 99                                       | 99                                               | 100                                            |
| chromosome 17  |                                             |                                          |                                                  |                                                |
| length (bp)    |                                             | 7865 vs. 7813                            |                                                  |                                                |
| % identity     |                                             | 95.80                                    |                                                  |                                                |
| query coverage |                                             | 99                                       |                                                  |                                                |

**Supplementary Table 5. Structural variations surrounding inversion breakpoints.**

| Inversion     | Location            | Type of SV                                                                                                                                                                                                                                                           | Description                                                                           | Gene                                        |
|---------------|---------------------|----------------------------------------------------------------------------------------------------------------------------------------------------------------------------------------------------------------------------------------------------------------------|---------------------------------------------------------------------------------------|---------------------------------------------|
| Chromosome 6  | Proximal and distal | Inverted duplication of 35 kb in S alleles and 45 kb in N alleles                                                                                                                                                                                                    | In the reference, coordinates are - chr6:22223000-22261500 and chr6:24913000-24951000 | <i>BTLN-2</i>                               |
|               | Proximal            | 30-50 kb insertion in CS10_hap1, CS10_hap2, BS2_hap2, BS3_hap2, BS6_hap1                                                                                                                                                                                             |                                                                                       |                                             |
|               | Distal              | 30-200 kb divergent sequence. 200 kb sequence is present in BS3_hap1, BS5_hap2, and BS6_hap2                                                                                                                                                                         |                                                                                       |                                             |
| Chromosome 12 | Proximal and distal | Inverted duplication of 8 kb in both S and N alleles                                                                                                                                                                                                                 | In the reference, coordinates are chr12:17818247-17826319 and chr12:25602941-25610712 | <i>FUT-9</i>                                |
|               | Distal              | 30 kb palindromic sequence                                                                                                                                                                                                                                           |                                                                                       |                                             |
| Chromosome 17 | Proximal and distal | Inverted duplication of 60 kb in both S and N alleles                                                                                                                                                                                                                | In the reference, coordinates are chr17:25728061-25805444                             | NA                                          |
|               | Proximal            | 20 kb sequence in one-three copies in all S and N alleles                                                                                                                                                                                                            |                                                                                       | fatty acid binding protein, liver-type-like |
|               | Distal              | 50 kb palindromic sequence in all S and N alleles except BS1_hap1, BS3_hap1, BS4_hap2, BS6_hap2. These exception alleles also don't have a telomeric sequence outside inversion. BS5_hap2 has one more palindromic sequence. It is absent in the reference assembly. | One of the copies is very fragmented. Has many repeats.                               | NA                                          |

|               |          |                                                                                                                                                                                                                                                                                                                                                                                                                                                                                                                                                                                             |                                                                                                                                                                         |
|---------------|----------|---------------------------------------------------------------------------------------------------------------------------------------------------------------------------------------------------------------------------------------------------------------------------------------------------------------------------------------------------------------------------------------------------------------------------------------------------------------------------------------------------------------------------------------------------------------------------------------------|-------------------------------------------------------------------------------------------------------------------------------------------------------------------------|
| Chromosome 23 |          | The telomeric sequence next to the breakpoint is of variable length in all assemblies, ranging from 0 kb to 300 kb                                                                                                                                                                                                                                                                                                                                                                                                                                                                          |                                                                                                                                                                         |
|               | Proximal | 130 kb sequence is present in 3-4 copies in all S and N alleles                                                                                                                                                                                                                                                                                                                                                                                                                                                                                                                             | Additional copy of this sequence is present in the opposite orientation in all N alleles, except BS4_hap2. It is absent in all S alleles except CS2_hap2 and CS10_hap1. |
|               |          | 13 kb insertion in eight N alleles; BS2_hap1, BS2_hap2, BS3_hap1, BS3_hap2, BS4_hap1, BS4_hap2, BS5_hap1, BS6_hap2.                                                                                                                                                                                                                                                                                                                                                                                                                                                                         | NACHT, LRR and PYD domains-containing protein 12-like                                                                                                                   |
|               | Distal   | 20 kb sequence in two copies. Only 10 kb of it is present in all S and N alleles. The entire 20 kb is present in CS7_hap2, CS8_hap1, and BS2_hap1<br>Insertion of variable lengths ranging from 50 to 700 kb. (CS2_hap2 at proximal, 300 kb<br>CS5_hap1 at distal, 50 kb;<br>CS5_hap2 at distal, 100 kb;<br>CS7_hap1 and hap2 at distal, 700 kb; CS8_hap1 at distal, 200 kb; CS8_hap2 at distal, 300 kb, 150 kb of it is homologous to that of CS8_hap1; CS10_hap1 at distal, 250 kb; BS1_hap1 at distal, around 250 kb, fragmented BS3_hap1 at distal, 100 kb; BS5_hap1 at distal, 500 kb) | nuclear body protein SP140-like protein                                                                                                                                 |



**Supplementary Table 6.  $\chi^2$  test (d.f. = 1) of possible enrichment of non-synonymous mutations among extremely differentiated SNPs (dAF > 0.95)**

| Inversion     | Observed | Expected | <i>P</i> -value (d.f. = 1) |
|---------------|----------|----------|----------------------------|
| Chromosome 6  | 7        | 5        | 0.37                       |
| Chromosome 12 | 13       | 9        | 0.18                       |
| Chromosome 17 | 2        | 2        | 1.00                       |
| Chromosome 23 | 3        | 2        | 0.47                       |

**Supplementary Table 7. Test of Hardy-Weinberg equilibrium for Atlantic herring chromosomal inversions in different populations.** Observed genotype frequencies were obtained from Fig. 1. Highlighted rows indicate fixation of one of the alleles and the fixed alleles are indicated in bold. Two-sided  $\chi^2$  was used.

| Population             | f(SS)        | f(NS) | f(NN)        | Sample size | f(N)  | $\chi^2$ (df = 1) |
|------------------------|--------------|-------|--------------|-------------|-------|-------------------|
| Chromosome 6           |              |       |              |             |       |                   |
| Canada Atlantic Spring | 0.000        | 0.000 | <b>1.000</b> | 6           | 1.000 |                   |
| Canada Atlantic Autumn | 0.000        | 0.000 | <b>1.000</b> | 6           | 1.000 |                   |
| Norway Atlantic Spring | 0.000        | 0.091 | 0.909        | 11          | 0.955 | 0.002             |
| Baltic Spring          | 0.000        | 0.000 | <b>1.000</b> | 14          | 1.000 |                   |
| Baltic Autumn          | 0.000        | 0.000 | <b>1.000</b> | 6           | 1.000 |                   |
| North Sea              | 0.333        | 0.667 | 0.000        | 3           | 0.333 | 0.250             |
| Ireland and Britain    | <b>1.000</b> | 0.000 | 0.000        | 15          | 0.000 |                   |
| Chromosome 12          |              |       |              |             |       |                   |
| Canada Atlantic Spring | 0.000        | 0.000 | <b>1.000</b> | 6           | 1.000 |                   |
| Canada Atlantic Autumn | 0.167        | 0.167 | 0.667        | 6           | 0.750 | 0.309             |
| Norway Atlantic Spring | 0.000        | 0.273 | 0.727        | 11          | 0.864 | 0.025             |
| Baltic Spring          | 0.000        | 0.000 | <b>1.000</b> | 14          | 1.000 |                   |
| Baltic Autumn          | 0.167        | 0.000 | 0.833        | 6           | 0.833 | 1.000             |
| North Sea              | <b>1.000</b> | 0.000 | 0.000        | 3           | 0.000 |                   |
| Ireland and Britain    | 0.933        | 0.067 | 0.000        | 15          | 0.033 | 0.001             |
| Chromosome 17          |              |       |              |             |       |                   |
| Canada Atlantic Spring | 0.000        | 0.000 | <b>1.000</b> | 6           | 1.000 |                   |
| Canada Atlantic Autumn | 0.000        | 0.000 | <b>1.000</b> | 6           | 1.000 |                   |
| Norway Atlantic Spring | 0.000        | 0.545 | 0.455        | 11          | 0.727 | 0.141             |
| Baltic Spring          | 0.000        | 0.071 | 0.929        | 14          | 0.964 | 0.001             |
| Baltic Autumn          | 0.000        | 0.500 | 0.500        | 6           | 0.750 | 0.111             |
| North Sea              | 0.333        | 0.667 | 0.000        | 3           | 0.333 | 0.250             |
| Ireland and Britain    | <b>1.000</b> | 0.000 | 0.000        | 15          | 0.000 |                   |
| Chromosome 23          |              |       |              |             |       |                   |
| Canada Atlantic Spring | 0.000        | 0.333 | 0.667        | 6           | 0.833 | 0.040             |
| Canada Atlantic Autumn | 0.000        | 0.000 | <b>1.000</b> | 6           | 1.000 |                   |
| Norway Atlantic Spring | 0.091        | 0.091 | 0.818        | 11          | 0.864 | 0.377             |
| Baltic Spring          | 0.000        | 0.286 | 0.714        | 14          | 0.857 | 0.028             |

|                     |       |       |              |    |       |       |
|---------------------|-------|-------|--------------|----|-------|-------|
| Baltic Autumn       | 0.000 | 0.000 | <b>1.000</b> | 6  | 1.000 |       |
| North Sea           | 0.333 | 0.333 | 0.333        | 3  | 0.500 | 0.111 |
| Ireland and Britain | 0.867 | 0.133 | 0.000        | 15 | 0.067 | 0.005 |

**Supplementary Table 8. Genome statistics of hybrid scaffold assemblies based on Bionano analysis.** Hap1 and hap2 are the two haplotype genomes and their statistics are shown on the top and bottom row for each sample, respectively. These hybrid scaffolds included large number of Ns.

| Samples | Genome size (Mb) | No. contigs | N50 (Mb) | N's per 100 Kb (Kb) | Not scaffolded sequence (Mb) |
|---------|------------------|-------------|----------|---------------------|------------------------------|
| CS10    | 937.3            | 123         | 23.0     | 28.6                | 104.2                        |
|         | 950.5            | 129         | 22.9     | 29.3                | 85.0                         |
| BS3     | 866.7            | 129         | 23.5     | 19.9                | 85.1                         |
|         | 871.4            | 135         | 23.4     | 21.0                | 70.0                         |

**Supplementary Table 9. Genotypes of 35 individuals from Southern (S) and Northern (N) haplotypes at each inversion, determined by local PCA and diagnostic SNPs for each inversion.**

| Individual                      | Population      | Inversion |       |       |       |
|---------------------------------|-----------------|-----------|-------|-------|-------|
|                                 |                 | Chr6      | Chr12 | Chr17 | Chr23 |
| AAL1_CelticSea_Atlantic_Winter  | Celtic Sea      | SS        | NS    | SS    | NS    |
| AAL2_CelticSea_Atlantic_Winter  | Celtic Sea      | SS        | SS    | SS    | NS    |
| AAL3_Celticsea_Atlantic_Winter  | Celtic Sea      | SS        | SS    | SS    | SS    |
| CS10                            | Celtic Sea      | SS        | SS    | SS    | SS    |
| CS4                             | Celtic Sea      | SS        | SS    | SS    | SS    |
| CS5                             | Celtic Sea      | SS        | SS    | SS    | SS    |
| CS7                             | Celtic Sea      | SS        | SS    | SS    | SS    |
| CS8                             | Celtic Sea      | SS        | SS    | SS    | SS    |
| CS2                             | Celtic Sea      | SS        | SS    | SS    | SS    |
| AK1_Downs_Atlantic_Winter       | English Channel | SS        | SS    | SS    | SS    |
| AK2_Downs_Atlantic_Winter       | English Channel | SS        | SS    | SS    | SS    |
| AK3_Downs_Atlantic_Winter       | English Channel | SS        | SS    | SS    | SS    |
| Z12_IsleofMan_Atlantic_Autumn   | Irish Sea       | SS        | SS    | SS    | SS    |
| Z14_IsleofMan_Atlantic_Autumn   | Irish Sea       | SS        | SS    | SS    | SS    |
| Z4_IsleofMan_Atlantic_Autumn    | Irish Sea       | SS        | SS    | SS    | SS    |
| BS1                             | Baltic Sea      | NN        | NN    | NN    | NN    |
| BS2                             | Baltic Sea      | NN        | NN    | NN    | NS    |
| BS3                             | Baltic Sea      | NN        | NN    | NN    | NN    |
| BS4                             | Baltic Sea      | NN        | NN    | NN    | NN    |
| BS5                             | Baltic Sea      | NN        | NN    | NS    | NN    |
| BS6                             | Baltic Sea      | NN        | NN    | NN    | NN    |
| Fehmarn3_Fehmarn_Baltic_Autumn  | Baltic Sea      | NN        | NN    | NS    | NN    |
| Fehmarn44_Fehmarn_Baltic_Autumn | Baltic Sea      | NN        | NN    | NS    | NN    |
| Fehmarn6_Fehmarn_Baltic_Autumn  | Baltic Sea      | NN        | NN    | NS    | NN    |
| Gavle100_Gävle_Baltic_Autumn    | Baltic Sea      | NN        | NN    | NN    | NN    |
| Gavle54_Gävle_Baltic_Autumn     | Baltic Sea      | NN        | SS    | NN    | NN    |
| Gavle98_Gävle_Baltic_Autumn     | Baltic Sea      | NN        | NN    | NN    | NN    |
| BF16_Hästkär_Baltic_Spring      | Baltic Sea      | NN        | NN    | NN    | NN    |
| BF18_Hästkär_Baltic_Spring      | Baltic Sea      | NN        | NN    | NN    | NS    |
| BF19_Hästkär_Baltic_Spring      | Baltic Sea      | NN        | NN    | NN    | NN    |
| BF21_Hästkär_Baltic_Spring      | Baltic Sea      | NN        | NN    | NN    | NN    |
| BM14_Hästkär_Baltic_Spring      | Baltic Sea      | NN        | NN    | NN    | NN    |
| BM15_Hästkär_Baltic_Spring      | Baltic Sea      | NN        | NN    | NN    | NS    |
| BM16_Hästkär_Baltic_Spring      | Baltic Sea      | NN        | NN    | NN    | NN    |
| BM19_Hästkär_Baltic_Spring      | Baltic Sea      | NN        | NN    | NN    | NS    |
