# Supplementary material for: The origin and maintenance of supergenes contributing to ecological adaptation in Atlantic herring
Source: PubMed Central journal article supplement (PMC11499932; doi:10.1038/s41467-024-53079-7), 2024-10-23
Supplement: 41467_2024_53079_MOESM4_ESM.pdf [file 41467_2024_53079_MOESM4_ESM.pdf]

## **Description of Additional Supplementary Files**

**Supplementary Data 1.** Genes within the inverted region and within 200 kb flanking the inversion breakpoints (shaded grey) for inversions on chromosomes 6, 12, 17, and 23 in Atlantic herring.

**Supplementary Data 2.** Information on non-synonymous SNPs showing extreme genetic differentiation between inversion haplotypes ( $dAF > 0.95$ ) in the inversion regions.
